# Supplementary material for: Use of Synthetic Single-Stranded Oligonucleotides as Artificial Test Soiling for Validation of Surgical Instrument Cleaning Processes
Source: Hindawi journal article supplement (doi:10.1155/2014/632127), 2014-01-01
Supplement: f1 [file 632127.f1.pdf]

## Supplementary information

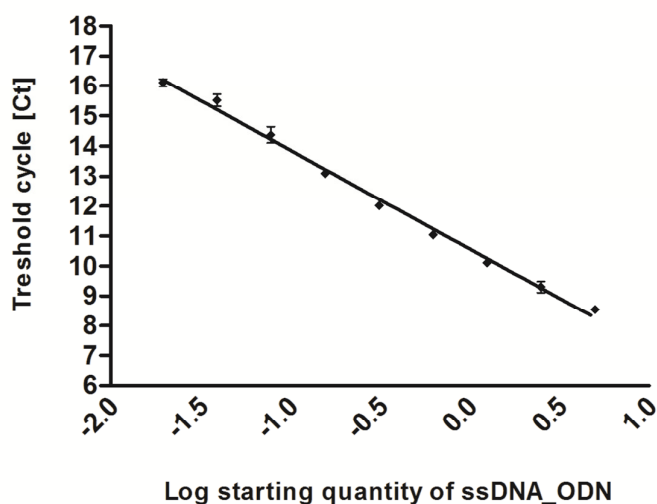

**Supplementary Figure 1:** Dynamic range of the quantitative real-time PCR (qPCR). The ssDNA\_ODN amounts (5, 2.5, 1.25, 0.625, 0.3125, 0.08, and 0.02 pg) are plotted logarithmically. The corresponding cycle threshold (Ct) values are plotted on the y-axis.

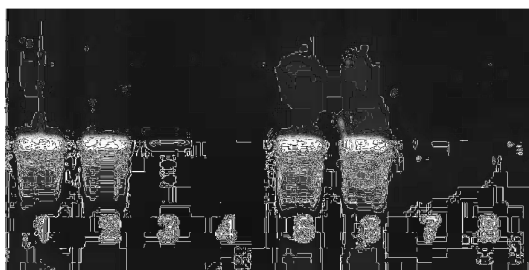

**Supplementary Figure 2:** Denaturing urea polyacrylamide gel electrophoresis analyses for detection of the eluted ssDNA\_ODN from test objects after three successive elutions in 5 M urea solution or water. Samples of 15  $\mu$ l were run on polyacrylamide urea gels. Lane 1: positive control of 5 M urea solution, Lane 2: First eluate using 5M urea solution, Lane 3: Second eluate using 5M urea solution, Lane 4: Third eluate using 5M urea solution, Lane 5: positive control of water, Lane 6: First eluate using water, 7: Second eluate using water, 8: Third eluate using water.

**Supplementary Table 1: Detected ssDNA\_ODN amounts by qPCR in the three successive elutions in 5 M urea solution or water (n=3).**

|                                       | <b>ssDNA_ODN amount [<math>\mu</math>g]</b> |                  |                    |                  |
|---------------------------------------|---------------------------------------------|------------------|--------------------|------------------|
|                                       | <b>positive control</b>                     | <b>1. eluate</b> | <b>2. eluate</b>   | <b>3. eluate</b> |
| <b>Elution with 5 M urea solution</b> | 4 $\pm$ 0.44                                | 3.6 $\pm$ 0.44   | 0.24 $\pm$ 0.05    | 0.01 $\pm$ 0.002 |
| <b>Elution with water</b>             | 4.5 $\pm$ 0.57                              | 1.11 $\pm$ 0.11  | 0.001 $\pm$ 0.0002 | n.d.             |

n.d.: not detectable
